# Supplementary material
Source: PubMed Central journal article supplement (PMC3503187)
Supplement: 1205785109_pnas.201205785SI.pdf [file 1205785109_pnas.201205785SI.pdf]

# Supporting Information

Banchereau et al. 10.1073/pnas.1205785109

## SI Materials and Methods

**DC Subsets.** CD34<sup>+</sup>-derived DCs were generated in vitro from CD34<sup>+</sup> HPCs isolated from the blood of healthy volunteers given GM-CSF (Neupogen) to mobilize precursor cells. HPCs were cultured at  $0.5 \times 10^6$  cells per mL in Yssel's medium (Irvine Scientific) supplemented with 5% (vol/vol) autologous serum, 50  $\mu$ M  $\beta$ -mercaptoethanol, 2 mM L-glutamine, 1% (vol/vol) penicillin/streptomycin, GM-CSF (50 ng/mL; Leukine), Flt3-L (100 ng/mL; R&D), and TNF- $\alpha$  (10 ng/mL; R&D) for 9 d. Media and cytokines were refreshed at day 5 of culture. Subsets of DCs, CD1a<sup>+</sup>CD14<sup>-</sup> LCs, and CD1a<sup>-</sup>CD14<sup>+</sup> DCs were then sorted, yielding a purity of 95–99%. Epidermal LCs (skin LCs) and dermal CD14<sup>+</sup> DCs were purified from normal human skin specimens. Specimens were incubated in bacterial protease dispase type 2 for 18 h at 4 °C and then for 2 h at 37 °C. Epidermal and dermal sheets were then separated, cut into small pieces (~1–10 mm), and placed in RPMI 1640 supplemented with 10% FBS. After 2 d, the cells that migrated into the medium were collected and further enriched by using a Ficoll-diatrizoate at a density of 1.077 g/dL DCs were purified by cell sorting after staining with anti-CD1a FITC (DAKO) and anti-CD14 APC mAbs (Invitrogen).

**DC/T-Cell Cocultures.** For autologous primary response assessments, naive CD8<sup>+</sup> T cells (CD8<sup>+</sup>CCR7<sup>+</sup>CD45RA<sup>+</sup>;  $1 \times 10^6$  cells per well) were stimulated with in vitro-generated LCs or CD14<sup>+</sup> DCs ( $5 \times 10^4$  cells per well) that were preincubated for 3 h with the HLA-A201-restricted MART-1 (26-35, ELAGIGILTV), gp100 (209-217, IMDQVPFSV), or a control peptide (3  $\mu$ M) in the presence of anti-CD8 (RPA-T8, BD Biosciences; T8, Beckman Coulter; or OKT8) or isotype control antibody (at indicated concentration). Cells were cultured for 9 d with IL-7 (10 U/mL; R&D) and CD40L (100 ng/mL; R&D). IL-2 (10 U/mL; R&D) was added at day 3. Expansion of peptide-specific CD8<sup>+</sup> T cells was determined by counting the number of cells binding peptide/HLA-A201 tetramers (Beckman Coulter) at the end of the culture period, as well as the CD8 mean fluorescence intensity on the tetramer binding cells. For the assessment of secondary response, autologous purified CD8<sup>+</sup> T cells or sorted memory CD8<sup>+</sup> T cells ( $1 \times 10^5$  cells per well) were cultured with LCs or CD14<sup>+</sup> DCs ( $5 \times 10^3$  cells per well), preloaded with 1  $\mu$ M HLA-A201-restricted Flu-MP-peptide (58-66, GILGFVFTL), and cultured with in the presence of anti-CD8 or isotype control antibody (3  $\mu$ g/mL unless otherwise indicated). Cells were cultured for 9 d in Yssel's complete medium supplemented with IL-7 (10 U/mL) and CD40L (100 ng/mL). IL-2 (10 U/mL) was added at day 3. Expansion of peptide-specific CD8<sup>+</sup> T cells was determined by counting the number of cells binding peptide/HLA-A201 tetramers (iTag; Beckman Coulter) at the end of the culture period. iTag tetramers possess a mutation that minimizes the aberrant effect that some CD8 antibodies might have on the specific binding of MHC class I tetramer (1). For primary allogeneic CD8<sup>+</sup> T-cell culture, sorted naive T cells were cultured with allogeneic-sorted mDC subsets, generated in vitro from CD34<sup>+</sup> HPCs, or isolated from skin at a ratio of 1:40. Where indicated, anti-CD8 mAb, soluble ILT-Fc fusion proteins, or anti-ILT receptor Ab was added at the indicated concentration. Cell proliferation was assessed by the level of thymidine incorporation after 5 d or CFSE dilution (0.5  $\mu$ M CFSE; Invitrogen). Expression of effector molecules granzyme A (BD Pharmingen), granzyme B (eBiosciences), and perforin (Fitzgerald) and surface molecules CD30, CD40L, and CD25 (all from BD Biosciences), were analyzed after 7 d by flow cytometry. For intracellular cytokine analysis, day 7-primed CD8<sup>+</sup> T cells

were restimulated for 24–40 h with either fresh DC or a combination of immobilized anti-CD3 (BD Biosciences) and soluble anti-CD28 (2  $\mu$ g/mL; eBiosciences) in fresh medium containing IL-2 (10 IU/mL). Intracellular IL-2, IFN- $\gamma$ , TNF- $\alpha$ , IL-4, or -13 (all from BD Biosciences) expression was assessed by flow cytometry after additional 5-h stimulation with PMA (25 ng/mL; Sigma) and ionomycin (1  $\mu$ M; Sigma). Cytokines in the culture supernatant of CFSE<sup>10</sup>CD11c<sup>-</sup>CD4<sup>-</sup>CD8<sup>+</sup> T cells ( $1.5 \times 10^5$  cells per ml) were measured by Luminex after 48-h restimulation with anti-CD3 and -CD28 mAbs.

**Cloning of ILT-Fc Molecules and Generation of ILT-Specific mAbs.** Vectors for the expression in stably transfected CHO-S cells of ILT-IgFc proteins were hILT2 GI:12636295 226-1602, hILT3 GI:85567629 20-1349, hILT4 GI:2660709 3-1376 with G13C and A18G changes, or hILT5 GI:2665646 3-1332 residues preceded by acc inserted into CET1019HS-puro-SceI (Millipore) in the Fse I-Nhe I interval with either GI:308035026 520-1017 preceded by gctagc and followed by caccatcaccatcaccattgagcgccgc or GI:194381819 774-1470 preceded by gctagccaccggc and followed by gcgccgc in the Nhe I-BstB I interval. Procedures for transfection and cell culture were as described (2), and purification of IgFc fusion proteins was as described (3). Procedures for immunization of mice, derivation of hybridomas, and purification of mAbs were as described (3). All procedures were reviewed and approved by the Institute Animal Care and Use Committee.

**Polyclonal Anti-ILT Serum Binding ELISA.** The coh-ILT2 or Fc-ILT4 proteins were used to coat a NUNC ELISA plate at a concentration of 1  $\mu$ g/mL in carbonate buffer (pH 9.6). Plates were incubated overnight at 4 °C, washed with PBS/0.05% Tween 20 (3 $\times$ ), and a serial dilution (in Pierce TBS blocking buffer) of the sera bleeds from the mice immunized with ILT2-Fc, ILT4-Fc, or hIgGFc alone was added to plates. Plates were incubated for 2 h at 37 °C and washed, and Pierce goat-anti-mouse IgG (H+L) (min  $\times$  BvHnHs Sr prot) peroxidase conjugate was added to wells. Plates were incubated at 37 °C for 2 h, washed and analyzed following addition of TMB substrate (Zymed).

**Immunofluorescent Staining of ILT on Human Skin.** Human abdominal skin was obtained from healthy donors who underwent cosmetic surgeries at Baylor University Medical Center, or at Barnes Jewish Hospital in accordance with Baylor Research Institute or Washington University Institutional Review Board guidelines. Cryosections were fixed in cold acetone, dried, and blocked for nonspecific fluorescence with Fc Receptor Block and Background Buster (Innovex) and goat serum. Sections were incubated in mouse anti-CD14 (clone M5E2; 10  $\mu$ g/mL) and rat anti-ILT4 (clone; 10  $\mu$ g/mL) or isotype antibodies. After washing, sections were stained with goat anti-mouse AF568 (Invitrogen) and goat anti-rat AF488 (Invitrogen) and then subsequently stained with DAPI (Molecular Probes). Single channel images were acquired by using the same exposures for antibody and isotype staining, and identical scaling was applied. Single channels were then assigned color and overlaid. The digital images were taken by using an Olympus BX51 with a Planapo20 $\times$ /0.7 or Planapo40 $\times$ /0.95 objective, a Roper Coolsnap HQ camera, and Metamorph software (Version 6.2r6; Molecular Devices).

**Structure Analysis.** Combinatorial extension (4) was used to align the MHCI  $\alpha$ 1/ $\alpha$ 2 platform (aa 1–180) of the LIR-2/HLA-G [Protein Data Bank (PDB) ID code 2DYP] (5) and CD8 $\alpha$ /HLA-











A, after 11 d of primary culture, the CFSE<sup>lo</sup>CD11c<sup>-</sup>CD4<sup>-</sup> cells were sorted, cultured at  $1.5 \times 10^5$  cells per mL, and stimulated with anti-CD3 and -CD28 mAbs for 48 h. IL-13 secretion was measured in the culture supernatant by using Luminex. (E) Similar to A, after 10 d the cells were expanded with a combination of plate bound anti-CD3, a soluble anti-CD28 mAbs and IL-2 for 24 h. The dilution of CFSE dye and intracellular expression of IFN- $\gamma$  and TNF- $\alpha$  were assessed after additional 5-h stimulation with PMA and ionomycin with monensin. Graphs show the relative CFSE<sup>lo</sup> populations based on their cytokine expression profile.





(C) mAbs specific to anti-ILT2 (mouse IgG1 clone 3F1) were added at 20  $\mu\text{g}/\text{mL}$  to cocultures of dermal CD14<sup>+</sup> DCs and naive CD8<sup>+</sup> T cells. As in A, the cells were analyzed by flow cytometry for the expression of intracellular IFN- $\gamma$ , TNF- $\alpha$ , and IL-2. CD8<sup>+</sup> T cells cultured with skin LCs served as a control. Graph shows the relative populations based on their cytokine expression profile.

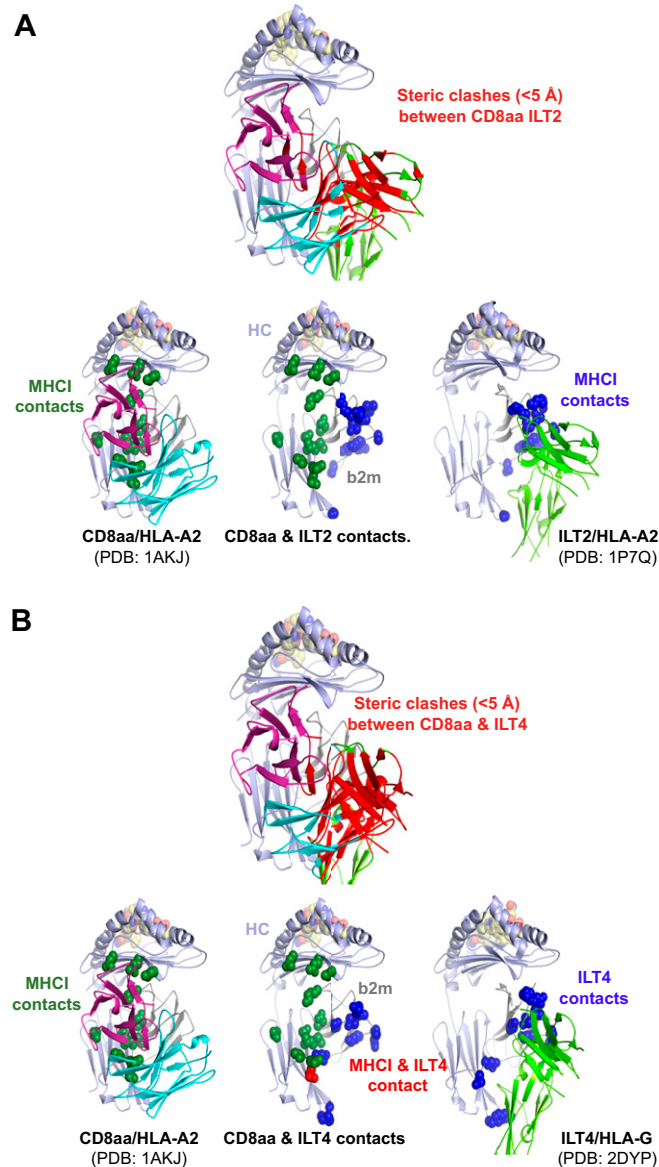

**Fig. 57.** CD8 $\alpha\alpha$  and ILT2 or ILT4 exclude each other sterically. (A) ILT2 and CD8 $\alpha\alpha$  cannot simultaneously engage MHC class I. The MHC class I  $\alpha 1/\alpha 2$  platform of the ILT2/HLA-A2 (PDB ID code 1P7Q) (3) and CD8 $\alpha\alpha$ /HLA-A-0201 (PDB ID code 1AKJ) (2) crystal structures were aligned to examine the potential steric/contact overlap between ILT2 and CD8 $\alpha\alpha$ . Complexes are shown as ribbon diagrams: CD8 $\alpha\alpha$  (cyan/magenta), ILT2 (light green), heavy chain (blue),  $\beta 2\text{m}$  (gray), peptide (yellow, spheres). (Upper) Ribbon diagram of significant steric clashes ( $\leq 5 \text{ \AA}$ , red) between ILT2 and CD8 $\alpha\alpha$  that would occur if both receptors engaged MHC I. (Lower) Contacts for each receptor/MHC I complex are shown as spheres: CD8 $\alpha\alpha$  (dark green), ILT2 (blue). Receptors were omitted in (Lower Center) for clarity. LIGPLOT analysis did not identify contacts shared by CD8 $\alpha\alpha$  and ILT2. (B) ILT4 and CD8 $\alpha\alpha$  cannot simultaneously engage MHC class I: The MHC I  $\alpha 1/\alpha 2$  platform of the ILT4/HLA-G (PDB ID code 2DYP) (1) and CD8 $\alpha\alpha$ /HLA-A\*0201 (PDB ID code 1AKJ) (2) crystal structures were aligned to examine the potential steric/contact overlap between ILT4 and CD8 $\alpha\alpha$ . Complexes are shown as ribbon diagrams: CD8 $\alpha\alpha$  (cyan/magenta), ILT4 (light green), heavy chain (blue),  $\beta 2\text{m}$  (gray), peptide (yellow, spheres). (Upper) Ribbon diagram of significant steric clashes ( $\leq 5 \text{ \AA}$ , red) between ILT4 and CD8 $\alpha\alpha$  that would occur if both receptors engaged MHC I. HLA-G was omitted from this figure. (Lower) Contacts for each receptor/MHC I complex are shown as spheres: CD8 $\alpha\alpha$  (dark green), ILT4 (blue), CD8 $\alpha\alpha$  and ILT4 (red, D227). Receptors were omitted in Lower Center for clarity.

- Shiroishi M, et al. (2006) Structural basis for recognition of the nonclassical MHC molecule HLA-G by the leukocyte Ig-like receptor B2 (LILRB2/LIR2/ILT4/CD85d). *Proc Natl Acad Sci USA* 103(44):16412–16417.
- Gao GF, et al. (1997) Crystal structure of the complex between human CD8 $\alpha$  and HLA-A2. *Nature* 387(6633):630–634.
- Willcox BE, Thomas LM, Bjorkman PJ (2003) Crystal structure of HLA-A2 bound to LIR-1, a host and viral major histocompatibility complex receptor. *Nat Immunol* 4(9):913–919.
